# Supplementary material
Source: Copernicus journal article supplement (doi:10.5194/egusphere-2026-3126)
Supplement: Supplementary file 1 [file egusphere-2026-3126-supplement.pdf]

**Supplementary Materials for “Mineralization Mechanism and  
Application Potential of Vaterite Induced by Two Bacterial Strains”**

Xiaofang Li<sup>1,2</sup>, Wenjun Nie<sup>2</sup>, Zhen Guo<sup>1</sup>, Lin Tang<sup>2</sup>, Fuguo Liu<sup>1</sup>, Bin Lian<sup>2\*</sup>

<sup>1</sup>Shandong Provincial University Laboratory for Protected Horticulture, Shandong Facility Horticulture Bioengineering Research Center, Weifang University of Science and Technology, Weifang 262700, China

<sup>2</sup> College of Life Sciences, College of Marine Science and Engineering, Nanjing Normal University, Nanjing 210023, China

\* Corresponding author Bin Lian, College of Life Sciences, College of Marine Science and Engineering, Nanjing Normal University, Nanjing 210023, China

Phone: +86 025 85898551 Fax: +86 025 85898551 E-mail: [bin2368@vip.163.com](mailto:bin2368@vip.163.com)

Table S1 Adsorption characteristics of biogenic vaterite induced by the two bacterial strains.

| Bacterial species    | BET Surface Area          | BJH Pore Volume             | BJH Pore Size |
|----------------------|---------------------------|-----------------------------|---------------|
| <i>B. velezensis</i> | 13.1854 m <sup>2</sup> /g | 0.028900 cm <sup>3</sup> /g | 8.4280 nm     |
| <i>P. putida</i>     | 2.5548 m <sup>2</sup> /g  | 0.008221 cm <sup>3</sup> /g | 8.3949 nm     |

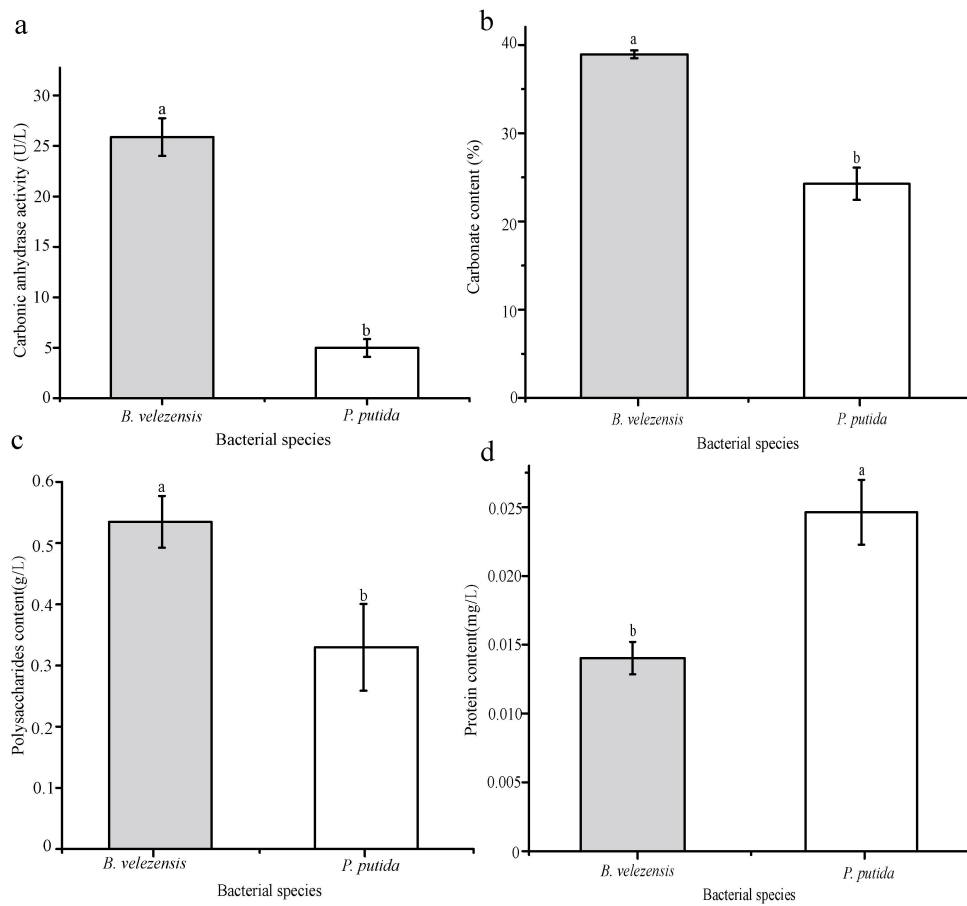

Fig. S1 Mechanistic analysis of differences in carbonate mineralization induced by the two bacterial strains. (a) Determination of CA activity; (b) carbonate content of biominerals; (c) polysaccharide content in the fermentation broth; (d) protein content in the fermentation broth.

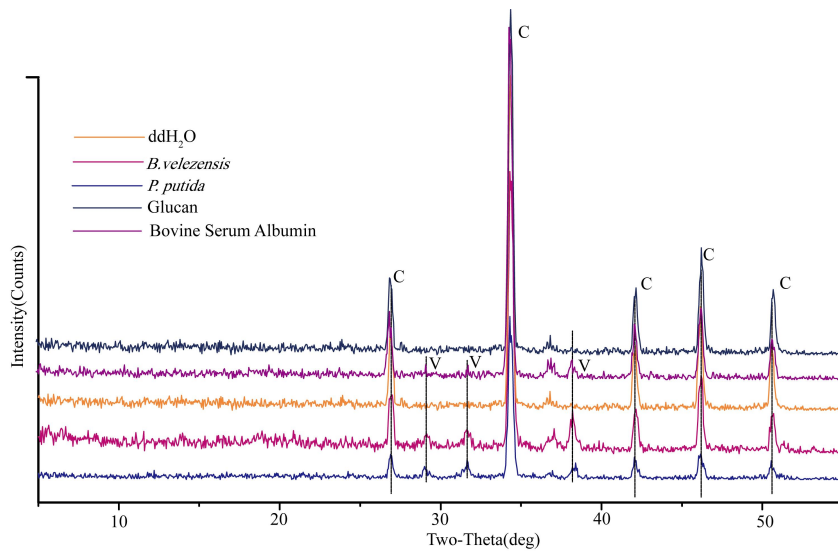

Fig. S2 Results of biomimetic mineralization experiments. C, calcite; V, Vaterite.
